# Supplementary material
Source: Elsevier journal article supplement (https://www.sciencedirect.com/science/article/pii/S1679007315000122)
Supplement: mmc1 [file S1679007315000122:mmc1.docx]

**N&C001-2014 - Supplementary material**

**Table 1 -** Planted tree species with tree seedlings density and richness assessed under their canopies in three Atlantic Forest restoration plantings at Piracicaba-SP, southeastern Brazil.

| | **Species** | **Family** | **Dispersal**  **syndrome** | **Successional**  **group** | **Number of trees**  **evaluated** | | --- | --- | --- | --- | --- | | *Alchornea glandulosa* | Euphorbiaceae | animal-dispersed | pionner | 7 | | *Bauhinia forficata* | Fabaceae | abiotic-dispersed | pionner | 7 | | *Cecropia pachystachya* | Urticaceae | animal-dispersed | pionner | 14 | | *Ceiba speciosa* | Malvaceae | abiotic-dispersed | non-pionner | 20 | | *Citharexylum myrianthum* | Verbenaceae | animal-dispersed | non-pionner | 22 | | *Colubrina glandulosa* | Rhamnaceae | animal-dispersed | non-pionner | 15 | | *Cordia americana* | Boraginaceae | abiotic-dispersed | non-pionner | 6 | | *Croton floribundus* | Euphorbiaceae | abiotic-dispersed | pionner | 7 | | *Croton urucurana* | Euphorbiaceae | abiotic-dispersed | pionner | 7 | | *Ficus obtusifolia* | Moraceae | abiotic-dispersed | non-pionner | 7 | | *Heliocarpus popayanensis* | Malvaceae | abiotic-dispersed | pionner | 7 | | *Lithrea molleoides* | Apocynaceae | animal-dispersed | non-pionner | 7 | | *Luehea divaricata* | Malvaceae | abiotic-dispersed | non-pionner | 7 | | *Maclura tinctoria* | Moraceae | animal-dispersed | non-pionner | 7 | | *Myracrodruon urundeuva* | Anacardiaceae | animal-dispersed | non-pionner | 8 | | *Nectandra megapotamica* | Lauraceae | animal-dispersed | non-pionner | 7 | | *Peltophorum dubium* | Fabaceae | abiotic-dispersed | non-pionner | 20 | | *Psidium guajava* | Myrtaceae | animal-dispersed | pionner | 5 | | *Schinus terebinthifolius* | Anacardiaceae | animal-dispersed | pionner | 21 | | *Solanum granuloso-leprosum* | Solanaceae | animal-dispersed | pionner | 7 | | *Trema micrantha* | Cannabaceae | animal-dispersed | pionner | 7 | |  |  |  |  |  | |
| --- | --- | --- | --- | --- | --- | --- | --- | --- | --- | --- | --- | --- | --- | --- | --- | --- | --- | --- | --- | --- | --- | --- | --- | --- | --- | --- | --- | --- | --- | --- | --- | --- | --- | --- | --- | --- | --- | --- | --- | --- | --- | --- | --- | --- | --- | --- | --- | --- | --- | --- | --- | --- | --- | --- | --- | --- | --- | --- | --- | --- | --- | --- | --- | --- | --- | --- | --- | --- | --- | --- | --- | --- | --- | --- | --- | --- | --- | --- | --- | --- | --- | --- | --- | --- | --- | --- | --- | --- | --- | --- | --- | --- | --- | --- | --- | --- | --- | --- | --- | --- | --- | --- | --- | --- | --- | --- | --- | --- | --- | --- | --- | --- | --- | --- | --- |
